# Supplementary material for: Exact and Asymptotically Exact Solutions for a Class of Assortment Problems
Source: Atypon-hosted journal article supplement (doi:10.1287/ijoc.1080.0274), 2008-06-21
Supplement: ijoc.1080.0274-sm-arbib_marinelli.pdf [file ijoc.1080.0274-sm-arbib_marinelli.pdf]

An appendix to the paper  
**Exact and Asymptotically Exact Solutions  
for a Class of Assortment Problems**

C. Arbib

Università degli Studi di L'Aquila, Dipartimento di Informatica  
via Vetoio, Coppito, I-67010 L'Aquila, Italy  
arbib@di.univaq.it

F. Marinelli

Università Politecnica delle Marche,  
Dipartimento di Ingegneria Informatica, Gestionale e dell'Automazione  
via Brecce Bianche, I-60131 Ancona, Italy  
marinelli@diiga.univpm.it

## 1. Enforcing the master problem formulation

If constraint (16) is not included in formulation (15), the pricing problem may yield unfeasible assortment patterns. However, as noted in §4.1, this constraint increases the pricing complexity, and is therefore unpractical.

To limit the amount of unfeasible columns generated, one can observe that, due to (9), knapsack constraints of the form

$$\sum_{S \subseteq J} |S| x_{iS} \leq p \quad i \in I \quad (28)$$

are valid inequalities for the restricted master problem (RMP).

This addition introduces in the pricing problem a penalty proportional to the current optimal dual variable  $\omega_i^*$  associated with (28) and the number of resource types in the assortment pattern: the objective of (15) transforms to

$$\min \sum_{j \in J} x_j (c_{ij} y_{ij} + \mu_{ij}^* + \omega_i^*)$$

and patterns with a large number of resource types are therefore discouraged from being selected.

Another enforcement of the master problem formulation can be done as follows. A subset  $\mathcal{C}$  of assortment patterns  $S$  is a *cover* if

$$|\bigcup_{S \in \mathcal{C}} S| > p$$

and is said minimal if  $\mathcal{C} - \{S\}$  is not a cover for any  $S \in \mathcal{C}$ . A cover inequality has the form

$$\sum_{i \in I} \sum_{S \in \mathcal{C}} x_{iS} \leq |p| - 1 \quad (29)$$

For any solution  $\bar{\mathbf{x}}$  of the current RMP, separating the most violated cover inequality means solving:

$$\begin{aligned} z_{min} = \min \sum_{i \in I} \sum_{S \subseteq J} (1 - \bar{x}_{iS}) \xi_{iS} & \quad (30) \\ \sum_{i \in I} \sum_{S \ni j} \xi_{iS} & \geq \xi_j \quad j \in \tilde{J} \\ \sum_{j \in \tilde{J}} \xi_j & \geq \tilde{p} + 1 \\ \xi_{iS}, \xi_j & \in \{0, 1\} \end{aligned}$$

where the  $\xi_{iS}$  choose the patterns  $S \subseteq \tilde{J}$  forming the (minimal) cover  $\mathcal{C}$ . Clearly  $z_{min} \geq 1$  if and only if  $\bar{\mathbf{x}}$  violates no cover inequalities.

Here,  $\tilde{J} \subseteq J$  is the (usually very small) set of resource types that appear in the assortment patterns associated with fractional variables of  $\bar{\mathbf{x}}$ , and  $\tilde{p} = p - |\cup\{S : x_{iS} = 1\}|$ . In fact  $\bar{x}_{iS} = 1$  makes the corresponding cost coefficient in (30) equal to 0, hence one can fix  $\xi_j = 1$  for all resource types in the assortment pattern  $S$ . On the other hand,  $\bar{x}_{iS} = 0$  implies that if the optimal  $\xi_{iS}$  of (30) is 1, no violated cover inequality exists.

A minimal cover  $\mathcal{C}$  has associated a dual variable  $\pi_{\mathcal{C}}$  which does not affect the pricing problem of §4.1. Including any new variable added by pricing to the RMP into any of the current cover inequalities would in fact destroy its minimality. (It is easy to see that all the cover inequalities are valid at any node of the enumeration tree.)

In the additional tests described in §6, cover inequalities were separated by program (30) using a general MIP solver. At most 100 cover cuts (29) were added at each node of the enumeration tree after the column generation process is completed; a maximum of 5000 cover cuts were allowed on the whole.

## 2. Additional tests on code configuration

Four further configurations were tested, each one differing from  $B$  by a single, distinct detail:

$C_6$ : with bound (21) instead of (22);

$C_7$ : with knapsack cuts (28);

$C_8$ : with cover cuts (29);

$C_9$ : RMP initialized by both program (25) and dummy variable (§6.1) at root.

Knapsack cuts (28) are useless in  $A$ -instances, and of little help in  $R$ -instances, where the infeasible columns generated are, on the average, 0.49. However, infeasible columns tend to increase as  $p$  decreases, reaching a peak of 22 for  $p = 5$ . In a test supplement done for  $p = 2$ , 3188 infeasible columns were on average priced in without cuts, and 2996 ( $-6.02\%$ ) with cuts, at the expense of a slight increase of CPU time ( $+0.9\%$ ).

Cover cuts (29) show a similar behavior. For  $A$ -instances, very few cuts of this type are added (0.03 on average, maximum 6). Separation time is negligible, but so is the reduction of the number of columns generated and of visited nodes. For  $R$ -instances the number of cover cuts generated rises (6.1 on average, maximum 304). Separation makes the computation time increase by 2.63%, without however reducing columns and nodes. Instead, a positive effect can again be observed for small values of  $p$ : for  $p = 2$ , 283.87 cover cuts were separated on average (with a peak of 2077), with a slight CPU time improvement ( $-0.75\%$ ) due to  $-3.86\%$  columns generated and  $-6.46\%$  nodes explored.

Bound (22) is almost useless for  $A$ -instances, but is effective for  $R$ -instances. In this case it is responsible of reducing the total computation time by 2.79% on average (for  $p = 2$ , a mean reduction of 3.33% has been observed).

Finally, an increase of CPU time ( $+8.05\%$  on average), mainly due to more columns generated ( $+2.35\%$  on average), has been observed for  $A$ -instances when the dummy variable is added at root. The effect of this choice is however negligible for  $R$ -instances.

### 3. Computational results exploded (Benchmark configuration)

Table 1: Results of the benchmark configuration on  $R$ -instances with  $p = 15$ .

| Instance            | CPU (sec.) | Cols | RMP solved | Col. gen. calls | Nodes | Tree depth | Best Int. | root LB  | GG value | $p$ -median opt. | $p$ -median CPU (sec.) |
|---------------------|------------|------|------------|-----------------|-------|------------|-----------|----------|----------|------------------|------------------------|
| 20R500 <sub>0</sub> | 0.523      | 1071 | 78         | 702             | 11    | 5          | 1215.569  | 1215.341 | 1200.619 | 1242.637         | 0.015                  |
| 20R500 <sub>1</sub> | 0.097      | 963  | 13         | 163             | 1     | 0          | 1598.950  | 1598.950 | 1584.962 | 1639.189         | 0.000                  |
| 20R500 <sub>2</sub> | 0.079      | 952  | 9          | 122             | 1     | 0          | 1397.780  | 1397.780 | 1383.410 | 1431.194         | 0.000                  |
| 20R500 <sub>3</sub> | 0.448      | 1008 | 49         | 547             | 9     | 3          | 1175.512  | 1175.384 | 1161.917 | 1212.832         | 0.016                  |
| 20R500 <sub>4</sub> | 0.113      | 975  | 14         | 207             | 1     | 0          | 1353.441  | 1353.441 | 1340.177 | 1392.073         | 0.000                  |
| 20R500 <sub>5</sub> | 0.179      | 982  | 19         | 249             | 3     | 1          | 1178.589  | 1178.569 | 1164.951 | 1194.754         | 0.016                  |
| 20R500 <sub>6</sub> | 0.221      | 1013 | 25         | 365             | 3     | 1          | 1469.282  | 1469.174 | 1454.094 | 1508.517         | 0.016                  |
| 20R500 <sub>7</sub> | 0.113      | 990  | 14         | 201             | 1     | 0          | 1050.533  | 1050.533 | 1039.076 | 1078.681         | 0.016                  |
| 20R500 <sub>8</sub> | 0.209      | 1010 | 29         | 301             | 3     | 1          | 2070.717  | 2070.717 | 2053.067 | 2104.126         | 0.000                  |
| 20R500 <sub>9</sub> | 0.127      | 995  | 19         | 267             | 1     | 0          | 1335.759  | 1335.759 | 1320.126 | 1375.681         | 0.016                  |
| 25R500 <sub>0</sub> | 0.525      | 1604 | 61         | 721             | 9     | 2          | 2102.192  | 2102.050 | 2081.302 | 2126.471         | 0.016                  |
| 25R500 <sub>1</sub> | 0.195      | 1505 | 17         | 293             | 1     | 0          | 2017.670  | 2017.670 | 1994.804 | 2057.398         | 0.015                  |
| 25R500 <sub>2</sub> | 0.483      | 1587 | 34         | 657             | 3     | 1          | 2054.880  | 2054.832 | 2037.221 | 2113.381         | 0.031                  |
| 25R500 <sub>3</sub> | 0.270      | 1539 | 23         | 368             | 1     | 0          | 1697.567  | 1697.567 | 1679.735 | 1724.544         | 0.031                  |
| 25R500 <sub>4</sub> | 0.226      | 1514 | 17         | 303             | 1     | 0          | 2619.668  | 2619.668 | 2600.226 | 2678.214         | 0.015                  |
| 25R500 <sub>5</sub> | 0.766      | 1591 | 78         | 1106            | 19    | 4          | 1500.425  | 1500.110 | 1480.690 | 1532.121         | 0.015                  |
| 25R500 <sub>6</sub> | 0.464      | 1570 | 40         | 617             | 9     | 2          | 1823.315  | 1823.230 | 1804.732 | 1860.344         | 0.015                  |
| 25R500 <sub>7</sub> | 0.223      | 1451 | 19         | 346             | 1     | 0          | 1902.904  | 1902.904 | 1885.720 | 1931.781         | 0.015                  |
| 25R500 <sub>8</sub> | 0.449      | 1585 | 46         | 747             | 5     | 2          | 1803.164  | 1802.946 | 1779.653 | 1838.273         | 0.031                  |
| 25R500 <sub>9</sub> | 0.180      | 1423 | 14         | 227             | 1     | 0          | 2357.647  | 2357.647 | 2344.921 | 2382.518         | 0.015                  |
| 30R500 <sub>0</sub> | 5.054      | 2539 | 214        | 3844            | 49    | 11         | 2006.952  | 2006.613 | 1975.135 | 2043.853         | 0.031                  |
| 30R500 <sub>1</sub> | 1.632      | 2342 | 111        | 1809            | 17    | 5          | 1828.210  | 1827.629 | 1802.603 | 1869.873         | 0.032                  |
| 30R500 <sub>2</sub> | 0.494      | 2197 | 27         | 526             | 1     | 0          | 2446.791  | 2446.791 | 2420.749 | 2501.833         | 0.031                  |
| 30R500 <sub>3</sub> | 2.252      | 2402 | 99         | 1815            | 21    | 4          | 2336.160  | 2335.741 | 2308.707 | 2414.291         | 0.031                  |
| 30R500 <sub>4</sub> | 2.642      | 2487 | 121        | 2297            | 15    | 4          | 2178.362  | 2177.925 | 2150.665 | 2227.577         | 0.032                  |
| 30R500 <sub>5</sub> | 2.292      | 2320 | 152        | 2654            | 33    | 10         | 2343.573  | 2343.116 | 2321.073 | 2386.739         | 0.031                  |
| 30R500 <sub>6</sub> | 2.776      | 2419 | 109        | 2221            | 15    | 5          | 2404.339  | 2403.900 | 2379.242 | 2453.761         | 0.016                  |
| 30R500 <sub>7</sub> | 0.639      | 2224 | 24         | 502             | 1     | 0          | 2561.974  | 2561.974 | 2535.758 | 2616.207         | 0.016                  |
| 30R500 <sub>8</sub> | 2.596      | 2389 | 212        | 2827            | 39    | 10         | 1978.161  | 1978.014 | 1954.579 | 2011.744         | 0.031                  |
| 30R500 <sub>9</sub> | 3.958      | 2486 | 226        | 3985            | 39    | 9          | 1943.948  | 1943.324 | 1915.793 | 1978.551         | 0.047                  |

Table 2: Results of the benchmark configuration on  $R$ -instances with  $p = 10$ .

| Instance            | CPU (sec.) | Cols | RMP solved | Col. gen. calls | Nodes | Tree depth | Best Int. | root LB  | GG value | $p$ -median opt. | $p$ -median CPU (sec.) |
|---------------------|------------|------|------------|-----------------|-------|------------|-----------|----------|----------|------------------|------------------------|
| 20R500 <sub>0</sub> | 1.562      | 1308 | 145        | 1769            | 25    | 8          | 1222.489  | 1221.522 | 1201.875 | 1247.414         | 0.015                  |
| 20R500 <sub>1</sub> | 0.381      | 1114 | 48         | 626             | 5     | 2          | 1605.886  | 1605.307 | 1585.373 | 1647.129         | 0.016                  |
| 20R500 <sub>2</sub> | 0.196      | 1055 | 23         | 313             | 1     | 0          | 1403.436  | 1403.436 | 1383.793 | 1433.580         | 0.015                  |
| 20R500 <sub>3</sub> | 0.559      | 1127 | 77         | 942             | 13    | 5          | 1182.185  | 1181.889 | 1163.046 | 1217.670         | 0.016                  |
| 20R500 <sub>4</sub> | 0.144      | 1028 | 21         | 305             | 1     | 0          | 1361.184  | 1361.184 | 1341.458 | 1396.025         | 0.016                  |
| 20R500 <sub>5</sub> | 2.304      | 1279 | 293        | 3101            | 73    | 7          | 1184.556  | 1183.903 | 1166.182 | 1196.435         | 0.015                  |
| 20R500 <sub>6</sub> | 4.685      | 1516 | 451        | 4928            | 99    | 16         | 1480.303  | 1478.551 | 1455.543 | 1516.061         | 0.015                  |
| 20R500 <sub>7</sub> | 1.385      | 1242 | 156        | 1916            | 29    | 8          | 1055.619  | 1055.029 | 1039.735 | 1079.852         | 0.015                  |
| 20R500 <sub>8</sub> | 1.412      | 1277 | 129        | 1598            | 19    | 6          | 2080.097  | 2079.177 | 2055.368 | 2110.730         | 0.015                  |
| 20R500 <sub>9</sub> | 0.578      | 1174 | 66         | 850             | 7     | 2          | 1343.762  | 1343.419 | 1321.582 | 1383.166         | 0.015                  |
| 25R500 <sub>0</sub> | 1.242      | 1827 | 83         | 1530            | 9     | 3          | 2114.689  | 2114.150 | 2084.308 | 2139.791         | 0.031                  |
| 25R500 <sub>1</sub> | 0.469      | 1651 | 39         | 639             | 5     | 1          | 2027.692  | 2027.645 | 1998.385 | 2067.257         | 0.015                  |
| 25R500 <sub>2</sub> | 2.859      | 2027 | 148        | 2597            | 19    | 6          | 2062.700  | 2062.407 | 2037.737 | 2121.759         | 0.015                  |
| 25R500 <sub>3</sub> | 0.498      | 1697 | 34         | 560             | 1     | 0          | 1706.215  | 1706.215 | 1682.447 | 1735.545         | 0.031                  |
| 25R500 <sub>4</sub> | 0.509      | 1694 | 36         | 645             | 1     | 0          | 2635.219  | 2635.219 | 2605.940 | 2691.977         | 0.015                  |
| 25R500 <sub>5</sub> | 1.852      | 1846 | 109        | 1883            | 17    | 5          | 1508.962  | 1508.417 | 1483.881 | 1540.297         | 0.015                  |
| 25R500 <sub>6</sub> | 3.492      | 2087 | 174        | 2899            | 17    | 6          | 1835.263  | 1834.541 | 1806.887 | 1875.327         | 0.031                  |
| 25R500 <sub>7</sub> | 0.427      | 1581 | 30         | 566             | 1     | 0          | 1912.937  | 1912.937 | 1890.637 | 1941.273         | 0.031                  |
| 25R500 <sub>8</sub> | 0.672      | 1728 | 62         | 820             | 3     | 1          | 1815.411  | 1815.183 | 1781.413 | 1848.271         | 0.031                  |
| 25R500 <sub>9</sub> | 0.483      | 1552 | 35         | 617             | 3     | 1          | 2364.245  | 2364.096 | 2346.333 | 2389.894         | 0.031                  |
| 30R500 <sub>0</sub> | 51.293     | 4062 | 920        | 14712           | 177   | 17         | 2021.848  | 2020.267 | 1980.676 | 2061.868         | 0.032                  |
| 30R500 <sub>1</sub> | 1.415      | 2493 | 47         | 1156            | 5     | 1          | 1840.748  | 1840.651 | 1806.421 | 1882.990         | 0.032                  |
| 30R500 <sub>2</sub> | 1.251      | 2435 | 33         | 803             | 1     | 0          | 2465.736  | 2465.736 | 2431.255 | 2531.328         | 0.078                  |
| 30R500 <sub>3</sub> | 9.830      | 3212 | 188        | 4117            | 25    | 9          | 2350.518  | 2349.488 | 2313.900 | 2433.106         | 0.078                  |
| 30R500 <sub>4</sub> | 41.981     | 4679 | 1181       | 14807           | 111   | 28         | 2196.381  | 2195.284 | 2162.008 | 2243.797         | 0.032                  |
| 30R500 <sub>5</sub> | 13.906     | 3255 | 721        | 8408            | 93    | 12         | 2358.514  | 2357.526 | 2326.935 | 2403.694         | 0.032                  |
| 30R500 <sub>6</sub> | 2.199      | 2630 | 51         | 1249            | 1     | 0          | 2415.583  | 2415.583 | 2383.331 | 2471.894         | 0.032                  |
| 30R500 <sub>7</sub> | 45.154     | 3818 | 1134       | 16041           | 221   | 28         | 2581.153  | 2579.821 | 2541.355 | 2630.495         | 0.031                  |
| 30R500 <sub>8</sub> | 2.464      | 2610 | 83         | 1869            | 5     | 2          | 1989.994  | 1989.912 | 1962.356 | 2026.506         | 0.031                  |
| 30R500 <sub>9</sub> | 41.119     | 4020 | 899        | 14942           | 157   | 27         | 1962.249  | 1960.644 | 1920.784 | 2001.313         | 0.032                  |

Table 3: Results of the benchmark configuration on  $R$ -instances with  $p = 5$ .

| Instance            | CPU (sec.) | Cols  | RMP solved | Col. gen. calls | Nodes | Tree depth | Best Int. | root LB  | GG value | $p$ -median opt. | $p$ -median CPU (sec.) |
|---------------------|------------|-------|------------|-----------------|-------|------------|-----------|----------|----------|------------------|------------------------|
| 20R500 <sub>0</sub> | 8.688      | 2357  | 378        | 4809            | 35    | 14         | 1244.396  | 1242.432 | 1213.800 | 1273.761         | 0.015                  |
| 20R500 <sub>1</sub> | 3.838      | 2084  | 216        | 2789            | 17    | 7          | 1640.531  | 1637.820 | 1599.598 | 1687.332         | 0.078                  |
| 20R500 <sub>2</sub> | 1.147      | 1489  | 102        | 1550            | 7     | 3          | 1430.143  | 1428.957 | 1395.360 | 1464.559         | 0.015                  |
| 20R500 <sub>3</sub> | 0.946      | 1440  | 52         | 937             | 1     | 0          | 1207.883  | 1207.883 | 1175.410 | 1245.120         | 0.016                  |
| 20R500 <sub>4</sub> | 4.529      | 2033  | 332        | 4302            | 29    | 9          | 1394.766  | 1392.662 | 1359.646 | 1423.948         | 0.031                  |
| 20R500 <sub>5</sub> | 3.849      | 1999  | 228        | 3184            | 15    | 6          | 1207.117  | 1205.463 | 1177.501 | 1218.101         | 0.016                  |
| 20R500 <sub>6</sub> | 8.104      | 2420  | 445        | 5767            | 41    | 10         | 1509.327  | 1505.110 | 1469.072 | 1549.227         | 0.015                  |
| 20R500 <sub>7</sub> | 2.695      | 1813  | 180        | 2520            | 17    | 6          | 1070.984  | 1070.441 | 1048.724 | 1091.669         | 0.000                  |
| 20R500 <sub>8</sub> | 0.502      | 1282  | 38         | 576             | 1     | 0          | 2105.437  | 2105.437 | 2072.309 | 2137.229         | 0.031                  |
| 20R500 <sub>9</sub> | 12.876     | 2636  | 449        | 6337            | 61    | 11         | 1381.303  | 1376.425 | 1339.832 | 1414.086         | 0.047                  |
| 25R500 <sub>0</sub> | 7.533      | 3045  | 243        | 4435            | 11    | 5          | 2155.505  | 2154.546 | 2108.478 | 2191.124         | 0.031                  |
| 25R500 <sub>1</sub> | 1.379      | 2158  | 63         | 1330            | 1     | 0          | 2066.345  | 2066.345 | 2016.907 | 2111.494         | 0.031                  |
| 25R500 <sub>2</sub> | 11.930     | 3508  | 279        | 5074            | 19    | 5          | 2091.699  | 2090.333 | 2049.166 | 2155.968         | 0.109                  |
| 25R500 <sub>3</sub> | 8.667      | 3132  | 244        | 4472            | 13    | 5          | 1740.165  | 1738.948 | 1701.560 | 1780.039         | 0.094                  |
| 25R500 <sub>4</sub> | 51.639     | 5198  | 1365       | 14872           | 87    | 12         | 2701.257  | 2693.818 | 2648.120 | 2750.844         | 0.015                  |
| 25R500 <sub>5</sub> | 6.810      | 2871  | 161        | 3075            | 9     | 4          | 1541.911  | 1540.914 | 1499.721 | 1578.168         | 0.172                  |
| 25R500 <sub>6</sub> | 181.328    | 6817  | 1531       | 22297           | 191   | 49         | 1879.082  | 1871.862 | 1827.672 | 1915.957         | 0.015                  |
| 25R500 <sub>7</sub> | 9.929      | 3325  | 509        | 7260            | 37    | 12         | 1948.769  | 1946.222 | 1916.645 | 1975.656         | 0.047                  |
| 25R500 <sub>8</sub> | 11.642     | 3199  | 303        | 5499            | 25    | 11         | 1852.302  | 1850.699 | 1800.376 | 1885.123         | 0.062                  |
| 25R500 <sub>9</sub> | 0.775      | 1818  | 54         | 872             | 1     | 0          | 2389.073  | 2389.073 | 2360.878 | 2411.923         | 0.031                  |
| 30R500 <sub>0</sub> | 347.244    | 9758  | 1600       | 22199           | 105   | 22         | 2071.104  | 2066.477 | 2003.861 | 2125.169         | 0.985                  |
| 30R500 <sub>1</sub> | 308.939    | 8989  | 1836       | 30657           | 163   | 22         | 1887.027  | 1881.096 | 1829.370 | 1928.906         | 0.140                  |
| 30R500 <sub>2</sub> | 4.087      | 3420  | 100        | 2518            | 1     | 0          | 2525.092  | 2525.092 | 2471.726 | 2604.159         | 0.109                  |
| 30R500 <sub>3</sub> | 227.076    | 8108  | 772        | 17344           | 77    | 25         | 2407.238  | 2401.546 | 2343.444 | 2479.154         | 0.094                  |
| 30R500 <sub>4</sub> | 479.842    | 10773 | 2312       | 36121           | 149   | 22         | 2249.671  | 2244.036 | 2199.553 | 2293.660         | 0.485                  |
| 30R500 <sub>5</sub> | 8.850      | 3892  | 189        | 4158            | 7     | 2          | 2415.108  | 2414.650 | 2363.994 | 2460.641         | 0.047                  |
| 30R500 <sub>6</sub> | 1117.826   | 12405 | 2421       | 41303           | 259   | 50         | 2476.814  | 2469.702 | 2414.200 | 2536.506         | 0.140                  |
| 30R500 <sub>7</sub> | 13.592     | 4455  | 253        | 5389            | 11    | 3          | 2643.452  | 2642.693 | 2587.964 | 2706.929         | 0.203                  |
| 30R500 <sub>8</sub> | 8.111      | 3830  | 173        | 3829            | 5     | 2          | 2032.386  | 2030.050 | 1988.868 | 2071.935         | 0.047                  |
| 30R500 <sub>9</sub> | 193.513    | 7815  | 1185       | 20978           | 87    | 29         | 2021.719  | 2015.013 | 1956.568 | 2065.576         | 0.891                  |

Table 4: Results of the benchmark configuration on  $R$ -instances with  $p = 2$ .

| Instance            | CPU (sec.) | Cols  | RMP solved | Col. gen. calls | Nodes | Tree depth | Best Int. | root LB  | GG value | $p$ -median opt. | $p$ -median CPU (sec.) |
|---------------------|------------|-------|------------|-----------------|-------|------------|-----------|----------|----------|------------------|------------------------|
| 20R500 <sub>0</sub> | 93.803     | 6909  | 861        | 9996            | 33    | 16         | 1308.409  | 1304.211 | 1249.501 | 1335.654         | 0.047                  |
| 20R500 <sub>1</sub> | 0.882      | 1777  | 81         | 1426            | 1     | 0          | 1721.400  | 1721.400 | 1666.149 | 1769.880         | 0.016                  |
| 20R500 <sub>2</sub> | 1.211      | 1824  | 87         | 1321            | 1     | 0          | 1507.626  | 1507.626 | 1459.040 | 1535.841         | 0.015                  |
| 20R500 <sub>3</sub> | 5.051      | 2723  | 215        | 3135            | 5     | 2          | 1293.924  | 1293.471 | 1224.811 | 1315.046         | 0.015                  |
| 20R500 <sub>4</sub> | 16.548     | 3914  | 351        | 5899            | 13    | 6          | 1496.940  | 1486.459 | 1426.250 | 1523.062         | 0.047                  |
| 20R500 <sub>5</sub> | 1.180      | 1927  | 90         | 1546            | 1     | 0          | 1278.456  | 1278.456 | 1235.111 | 1286.610         | 0.015                  |
| 20R500 <sub>6</sub> | 39.638     | 5282  | 606        | 7635            | 23    | 11         | 1612.368  | 1596.576 | 1529.437 | 1618.987         | 0.016                  |
| 20R500 <sub>7</sub> | 36.368     | 4851  | 541        | 6217            | 17    | 8          | 1125.562  | 1122.548 | 1071.414 | 1140.516         | 0.031                  |
| 20R500 <sub>8</sub> | 18.419     | 3971  | 371        | 4786            | 9     | 4          | 2213.260  | 2209.322 | 2148.903 | 2246.878         | 0.047                  |
| 20R500 <sub>9</sub> | 20.281     | 4226  | 341        | 5511            | 11    | 5          | 1468.634  | 1464.957 | 1399.765 | 1498.194         | 0.062                  |
| 25R500 <sub>0</sub> | 310.665    | 10018 | 1265       | 16954           | 31    | 15         | 2304.744  | 2282.347 | 2179.362 | 2340.428         | 0.422                  |
| 25R500 <sub>1</sub> | 163.663    | 8574  | 766        | 13547           | 17    | 8          | 2221.557  | 2203.048 | 2108.377 | 2253.127         | 0.469                  |
| 25R500 <sub>2</sub> | 5.272      | 3296  | 104        | 2353            | 1     | 0          | 2192.100  | 2192.100 | 2098.757 | 2242.188         | 0.032                  |
| 25R500 <sub>3</sub> | 111.108    | 7629  | 676        | 7883            | 19    | 9          | 1850.554  | 1849.506 | 1770.434 | 1890.336         | 0.047                  |
| 25R500 <sub>4</sub> | 240.887    | 10216 | 1036       | 15188           | 23    | 11         | 2885.089  | 2865.909 | 2776.944 | 2922.392         | 0.312                  |
| 25R500 <sub>5</sub> | 133.467    | 8120  | 780        | 15198           | 11    | 5          | 1659.239  | 1648.262 | 1563.359 | 1706.550         | 1.140                  |
| 25R500 <sub>6</sub> | 213.160    | 8845  | 990        | 12859           | 21    | 10         | 2002.099  | 1978.603 | 1896.055 | 2038.539         | 0.297                  |
| 25R500 <sub>7</sub> | 10.751     | 3497  | 131        | 2930            | 1     | 0          | 2037.149  | 2037.149 | 1970.995 | 2092.259         | 0.922                  |
| 25R500 <sub>8</sub> | 5.273      | 3341  | 139        | 2775            | 1     | 0          | 1954.676  | 1954.676 | 1853.280 | 1993.033         | 0.094                  |
| 25R500 <sub>9</sub> | 16.592     | 4291  | 371        | 6581            | 1     | 0          | 2532.666  | 2532.666 | 2486.270 | 2543.218         | 0.031                  |
| 30R500 <sub>0</sub> | 620.511    | 15886 | 1702       | 24401           | 41    | 20         | 2226.573  | 2209.190 | 2096.427 | 2261.010         | 2.047                  |
| 30R500 <sub>1</sub> | 705.968    | 16451 | 1787       | 23620           | 41    | 20         | 2017.397  | 2006.927 | 1903.080 | 2065.862         | 0.719                  |
| 30R500 <sub>2</sub> | 25.832     | 5810  | 185        | 5167            | 1     | 0          | 2692.845  | 2692.845 | 2578.769 | 2779.468         | 0.984                  |
| 30R500 <sub>3</sub> | 1599.971   | 25469 | 3336       | 33065           | 65    | 32         | 2557.027  | 2531.054 | 2418.607 | 2606.880         | 0.532                  |
| 30R500 <sub>4</sub> | 365.206    | 11126 | 993        | 21702           | 7     | 3          | 2380.875  | 2375.422 | 2295.193 | 2430.217         | 0.157                  |
| 30R500 <sub>5</sub> | 424.742    | 13745 | 1085       | 20187           | 25    | 12         | 2620.107  | 2611.636 | 2495.606 | 2678.984         | 2.235                  |
| 30R500 <sub>6</sub> | 598.281    | 17479 | 1742       | 23002           | 51    | 25         | 2650.641  | 2641.872 | 2536.639 | 2702.533         | 1.031                  |
| 30R500 <sub>7</sub> | 596.309    | 18657 | 1441       | 21642           | 39    | 19         | 2843.355  | 2831.211 | 2719.896 | 2888.737         | 0.094                  |
| 30R500 <sub>8</sub> | 645.790    | 18074 | 1439       | 31242           | 27    | 13         | 2189.728  | 2173.029 | 2080.453 | 2227.793         | 0.656                  |
| 30R500 <sub>9</sub> | 307.006    | 11703 | 755        | 17018           | 15    | 7          | 2178.855  | 2177.622 | 2073.915 | 2222.244         | 0.157                  |

Table 5: Results of the benchmark configuration on  $A$ -instances with  $p = 15$  and  $\Delta = 100$ .

| Instance             | CPU (sec.) | Cols  | RMP solved | Col. gen. calls | Nodes | Tree depth | Best Int. | root LB  | GG value | $p$ -median opt. | $p$ -median CPU (sec.) |
|----------------------|------------|-------|------------|-----------------|-------|------------|-----------|----------|----------|------------------|------------------------|
| 20.A100 <sub>0</sub> | 0.140      | 3807  | 6          | 48              | 1     | 0          | 685.580   | 685.580  | 605.600  | 704.788          | 0.047                  |
| 20.A100 <sub>1</sub> | 0.203      | 4878  | 6          | 48              | 1     | 0          | 973.779   | 973.779  | 888.718  | 1002.949         | 0.078                  |
| 20.A100 <sub>2</sub> | 0.453      | 4777  | 39         | 281             | 1     | 0          | 897.058   | 897.058  | 806.029  | 928.049          | 0.062                  |
| 20.A100 <sub>3</sub> | 0.312      | 4673  | 20         | 255             | 1     | 0          | 732.474   | 732.474  | 640.852  | 756.178          | 0.062                  |
| 20.A100 <sub>4</sub> | 0.219      | 3625  | 14         | 203             | 1     | 0          | 874.318   | 874.318  | 789.307  | 906.078          | 0.063                  |
| 20.A100 <sub>5</sub> | 0.110      | 2674  | 7          | 49              | 1     | 0          | 821.398   | 821.398  | 720.640  | 839.222          | 0.047                  |
| 20.A100 <sub>6</sub> | 0.281      | 3946  | 17         | 208             | 1     | 0          | 886.940   | 886.940  | 840.551  | 904.154          | 0.063                  |
| 20.A100 <sub>7</sub> | 0.203      | 4410  | 9          | 140             | 1     | 0          | 789.507   | 789.507  | 690.842  | 824.302          | 0.062                  |
| 20.A100 <sub>8</sub> | 0.156      | 4267  | 6          | 46              | 1     | 0          | 696.705   | 696.705  | 598.152  | 707.822          | 0.062                  |
| 20.A100 <sub>9</sub> | 0.110      | 2741  | 6          | 53              | 1     | 0          | 949.772   | 949.772  | 866.030  | 978.900          | 0.032                  |
| 25.A100 <sub>0</sub> | 0.344      | 7299  | 12         | 179             | 1     | 0          | 971.409   | 971.409  | 840.059  | 991.710          | 0.093                  |
| 25.A100 <sub>1</sub> | 1.078      | 9359  | 38         | 454             | 1     | 0          | 1143.101  | 1143.101 | 1040.518 | 1177.696         | 0.125                  |
| 25.A100 <sub>2</sub> | 0.938      | 8459  | 28         | 424             | 1     | 0          | 1294.925  | 1294.925 | 1199.279 | 1337.368         | 0.172                  |
| 25.A100 <sub>3</sub> | 0.422      | 7194  | 12         | 216             | 1     | 0          | 819.918   | 819.918  | 732.396  | 843.270          | 0.093                  |
| 25.A100 <sub>4</sub> | 0.906      | 7047  | 45         | 584             | 1     | 0          | 1121.624  | 1121.624 | 1050.192 | 1165.475         | 0.141                  |
| 25.A100 <sub>5</sub> | 0.625      | 7767  | 20         | 347             | 1     | 0          | 1264.470  | 1264.470 | 1146.695 | 1290.021         | 0.109                  |
| 25.A100 <sub>6</sub> | 1.172      | 10763 | 36         | 428             | 1     | 0          | 834.394   | 834.394  | 712.858  | 865.010          | 0.141                  |
| 25.A100 <sub>7</sub> | 0.265      | 6644  | 7          | 82              | 1     | 0          | 1209.840  | 1209.840 | 1107.605 | 1243.528         | 0.094                  |
| 25.A100 <sub>8</sub> | 0.453      | 7215  | 17         | 203             | 1     | 0          | 1254.264  | 1254.264 | 1143.621 | 1285.637         | 0.109                  |
| 25.A100 <sub>9</sub> | 0.312      | 8456  | 6          | 58              | 1     | 0          | 1046.395  | 1046.395 | 946.575  | 1055.249         | 0.110                  |
| 30.A100 <sub>0</sub> | 1.953      | 11425 | 47         | 802             | 1     | 0          | 1298.743  | 1298.743 | 1166.412 | 1327.961         | 0.188                  |
| 30.A100 <sub>1</sub> | 0.594      | 9429  | 19         | 259             | 1     | 0          | 1103.210  | 1103.210 | 967.535  | 1140.135         | 0.140                  |
| 30.A100 <sub>2</sub> | 1.000      | 12522 | 21         | 338             | 1     | 0          | 1202.128  | 1202.128 | 1093.692 | 1230.918         | 0.203                  |
| 30.A100 <sub>3</sub> | 1.781      | 11216 | 61         | 691             | 1     | 0          | 1090.222  | 1090.222 | 970.679  | 1118.249         | 0.187                  |
| 30.A100 <sub>4</sub> | 1.203      | 10405 | 31         | 575             | 1     | 0          | 962.928   | 962.928  | 846.436  | 989.543          | 0.219                  |
| 30.A100 <sub>5</sub> | 1.063      | 10383 | 33         | 476             | 1     | 0          | 1276.360  | 1276.360 | 1151.407 | 1306.636         | 0.172                  |
| 30.A100 <sub>6</sub> | 3.282      | 16526 | 68         | 1095            | 1     | 0          | 950.313   | 950.313  | 840.689  | 973.222          | 0.328                  |
| 30.A100 <sub>7</sub> | 1.328      | 10493 | 40         | 538             | 1     | 0          | 1342.514  | 1342.514 | 1236.047 | 1380.192         | 0.172                  |
| 30.A100 <sub>8</sub> | 1.250      | 10729 | 40         | 564             | 1     | 0          | 1281.656  | 1281.656 | 1152.775 | 1313.986         | 0.156                  |
| 30.A100 <sub>9</sub> | 1.563      | 9371  | 79         | 756             | 1     | 0          | 1188.332  | 1188.332 | 1045.188 | 1217.638         | 0.172                  |

Table 6: Results of the benchmark configuration on  $A$ -instances with  $p = 10$  and  $\Delta = 100$ .

| Instance            | CPU (sec.) | Cols  | RMP solved | Col. gen. calls | Nodes | Tree depth | Best Int. | root LB  | GG value | $p$ -median opt. | $p$ -median CPU (sec.) |
|---------------------|------------|-------|------------|-----------------|-------|------------|-----------|----------|----------|------------------|------------------------|
| 20A100 <sub>0</sub> | 0.172      | 3818  | 8          | 101             | 1     | 0          | 685.804   | 685.804  | 606.257  | 704.788          | 0.047                  |
| 20A100 <sub>1</sub> | 0.531      | 5070  | 33         | 345             | 1     | 0          | 980.120   | 980.120  | 890.360  | 1007.761         | 0.093                  |
| 20A100 <sub>2</sub> | 0.640      | 4873  | 52         | 451             | 1     | 0          | 902.887   | 902.887  | 808.089  | 932.255          | 0.078                  |
| 20A100 <sub>3</sub> | 0.562      | 4816  | 37         | 468             | 1     | 0          | 736.861   | 736.861  | 642.084  | 758.736          | 0.078                  |
| 20A100 <sub>4</sub> | 0.735      | 3885  | 41         | 554             | 1     | 0          | 880.154   | 880.154  | 792.048  | 912.977          | 0.063                  |
| 20A100 <sub>5</sub> | 0.141      | 2702  | 16         | 134             | 1     | 0          | 822.566   | 822.566  | 721.657  | 839.446          | 0.032                  |
| 20A100 <sub>6</sub> | 1.031      | 4204  | 120        | 803             | 5     | 2          | 893.108   | 892.850  | 844.687  | 909.888          | 0.078                  |
| 20A100 <sub>7</sub> | 0.812      | 4614  | 115        | 425             | 1     | 0          | 793.882   | 793.882  | 691.126  | 828.283          | 0.062                  |
| 20A100 <sub>8</sub> | 0.219      | 4298  | 11         | 140             | 1     | 0          | 697.388   | 697.388  | 598.533  | 707.945          | 0.062                  |
| 20A100 <sub>9</sub> | 0.203      | 2821  | 24         | 213             | 1     | 0          | 953.004   | 953.004  | 868.285  | 980.916          | 0.047                  |
| 25A100 <sub>0</sub> | 0.797      | 7486  | 44         | 442             | 1     | 0          | 975.938   | 975.938  | 842.670  | 996.301          | 0.140                  |
| 25A100 <sub>1</sub> | 2.485      | 9677  | 99         | 1034            | 1     | 0          | 1151.677  | 1151.677 | 1045.488 | 1185.284         | 0.188                  |
| 25A100 <sub>2</sub> | 2.687      | 8841  | 83         | 1018            | 1     | 0          | 1307.714  | 1307.714 | 1207.774 | 1348.719         | 0.187                  |
| 25A100 <sub>3</sub> | 0.766      | 7356  | 36         | 370             | 1     | 0          | 823.781   | 823.781  | 735.140  | 848.027          | 0.125                  |
| 25A100 <sub>4</sub> | 2.282      | 7498  | 139        | 941             | 1     | 0          | 1130.386  | 1130.386 | 1054.583 | 1173.696         | 0.156                  |
| 25A100 <sub>5</sub> | 1.281      | 7982  | 45         | 713             | 1     | 0          | 1271.066  | 1271.066 | 1150.397 | 1296.027         | 0.125                  |
| 25A100 <sub>6</sub> | 2.766      | 11120 | 107        | 865             | 1     | 0          | 840.693   | 840.693  | 715.315  | 870.314          | 0.172                  |
| 25A100 <sub>7</sub> | 0.578      | 6780  | 27         | 357             | 1     | 0          | 1213.520  | 1213.520 | 1110.728 | 1248.816         | 0.125                  |
| 25A100 <sub>8</sub> | 1.157      | 7370  | 71         | 701             | 1     | 0          | 1260.558  | 1260.558 | 1150.494 | 1294.819         | 0.140                  |
| 25A100 <sub>9</sub> | 0.750      | 8595  | 37         | 300             | 1     | 0          | 1048.878  | 1048.878 | 949.505  | 1057.080         | 0.125                  |
| 30A100 <sub>0</sub> | 5.157      | 11988 | 161        | 1633            | 1     | 0          | 1313.312  | 1313.312 | 1174.675 | 1342.404         | 0.313                  |
| 30A100 <sub>1</sub> | 0.969      | 9500  | 47         | 342             | 1     | 0          | 1106.899  | 1106.899 | 970.942  | 1143.755         | 0.156                  |
| 30A100 <sub>2</sub> | 2.281      | 12742 | 64         | 721             | 1     | 0          | 1207.266  | 1207.266 | 1100.509 | 1234.530         | 0.234                  |
| 30A100 <sub>3</sub> | 10.141     | 12005 | 214        | 2959            | 3     | 1          | 1098.919  | 1098.917 | 974.561  | 1125.123         | 0.282                  |
| 30A100 <sub>4</sub> | 7.829      | 11163 | 336        | 2580            | 9     | 3          | 972.231   | 972.020  | 850.417  | 998.796          | 0.203                  |
| 30A100 <sub>5</sub> | 2.407      | 10727 | 70         | 1101            | 1     | 0          | 1287.455  | 1287.455 | 1157.980 | 1314.622         | 0.219                  |
| 30A100 <sub>6</sub> | 7.234      | 17048 | 91         | 1504            | 1     | 0          | 957.768   | 957.768  | 845.363  | 982.254          | 0.406                  |
| 30A100 <sub>7</sub> | 2.703      | 10848 | 96         | 1000            | 1     | 0          | 1354.870  | 1354.870 | 1244.771 | 1389.978         | 0.219                  |
| 30A100 <sub>8</sub> | 2.063      | 10962 | 54         | 950             | 1     | 0          | 1287.447  | 1287.447 | 1155.549 | 1318.368         | 0.188                  |
| 30A100 <sub>9</sub> | 2.313      | 9725  | 78         | 1103            | 1     | 0          | 1196.095  | 1196.095 | 1051.755 | 1224.253         | 0.172                  |

Table 7: Results of the benchmark configuration on  $A$ -instances with  $p = 5$  and  $\Delta = 100$ .

| Instance             | CPU (sec.) | Cols  | RMP solved | Col. gen. calls | Nodes | Tree depth | Best Int. | root LB  | GG value | $p$ -median opt. | $p$ -median CPU (sec.) |
|----------------------|------------|-------|------------|-----------------|-------|------------|-----------|----------|----------|------------------|------------------------|
| 20.A100 <sub>0</sub> | 0.328      | 3902  | 26         | 308             | 1     | 0          | 690.928   | 690.928  | 614.593  | 710.304          | 0.062                  |
| 20.A100 <sub>1</sub> | 2.015      | 5508  | 109        | 1049            | 1     | 0          | 999.348   | 999.348  | 902.439  | 1029.595         | 0.109                  |
| 20.A100 <sub>2</sub> | 1.890      | 5380  | 117        | 1587            | 1     | 0          | 923.436   | 923.436  | 824.711  | 960.102          | 0.125                  |
| 20.A100 <sub>3</sub> | 2.187      | 5298  | 98         | 1124            | 1     | 0          | 753.373   | 753.373  | 651.479  | 773.978          | 0.188                  |
| 20.A100 <sub>4</sub> | 7.719      | 5367  | 387        | 3744            | 9     | 3          | 900.900   | 900.487  | 807.388  | 936.657          | 0.078                  |
| 20.A100 <sub>5</sub> | 0.719      | 2991  | 154        | 926             | 3     | 1          | 833.496   | 833.419  | 733.891  | 847.536          | 0.047                  |
| 20.A100 <sub>6</sub> | 1.062      | 4447  | 70         | 781             | 1     | 0          | 912.882   | 912.882  | 857.638  | 929.737          | 0.078                  |
| 20.A100 <sub>7</sub> | 2.000      | 5214  | 112        | 1266            | 1     | 0          | 809.210   | 809.210  | 703.442  | 849.505          | 0.093                  |
| 20.A100 <sub>8</sub> | 0.500      | 4481  | 50         | 390             | 1     | 0          | 706.667   | 706.667  | 605.681  | 718.554          | 0.078                  |
| 20.A100 <sub>9</sub> | 1.766      | 3426  | 203        | 1794            | 3     | 1          | 972.808   | 972.644  | 881.969  | 999.764          | 0.063                  |
| 25.A100 <sub>0</sub> | 2.922      | 8153  | 116        | 1501            | 1     | 0          | 996.754   | 996.754  | 859.630  | 1023.837         | 0.187                  |
| 25.A100 <sub>1</sub> | 19.735     | 11337 | 209        | 3274            | 1     | 0          | 1178.538  | 1178.538 | 1065.075 | 1214.605         | 0.531                  |
| 25.A100 <sub>2</sub> | 21.704     | 11101 | 274        | 4309            | 1     | 0          | 1350.631  | 1350.631 | 1233.536 | 1387.995         | 0.422                  |
| 25.A100 <sub>3</sub> | 9.125      | 8737  | 366        | 2638            | 3     | 1          | 848.701   | 848.687  | 747.922  | 873.324          | 0.219                  |
| 25.A100 <sub>4</sub> | 4.000      | 8175  | 158        | 1981            | 1     | 0          | 1161.475  | 1161.475 | 1075.819 | 1202.766         | 0.234                  |
| 25.A100 <sub>5</sub> | 3.578      | 8814  | 159        | 1621            | 1     | 0          | 1304.233  | 1304.233 | 1176.276 | 1334.436         | 0.234                  |
| 25.A100 <sub>6</sub> | 7.891      | 12021 | 157        | 2083            | 1     | 0          | 855.569   | 855.569  | 728.735  | 884.723          | 0.297                  |
| 25.A100 <sub>7</sub> | 2.000      | 7172  | 154        | 1062            | 1     | 0          | 1231.295  | 1231.295 | 1125.185 | 1264.802         | 0.141                  |
| 25.A100 <sub>8</sub> | 4.454      | 8610  | 204        | 1952            | 1     | 0          | 1293.592  | 1293.592 | 1176.562 | 1325.173         | 0.218                  |
| 25.A100 <sub>9</sub> | 2.391      | 8956  | 148        | 1423            | 1     | 0          | 1066.872  | 1066.872 | 966.539  | 1072.308         | 0.172                  |
| 30.A100 <sub>0</sub> | 30.484     | 14566 | 295        | 5287            | 1     | 0          | 1351.849  | 1351.849 | 1204.477 | 1380.791         | 0.406                  |
| 30.A100 <sub>1</sub> | 5.891      | 10265 | 252        | 3006            | 1     | 0          | 1124.112  | 1124.112 | 987.739  | 1162.576         | 0.187                  |
| 30.A100 <sub>2</sub> | 26.094     | 15520 | 835        | 5006            | 5     | 1          | 1242.392  | 1242.326 | 1124.858 | 1265.677         | 0.390                  |
| 30.A100 <sub>3</sub> | 47.578     | 15129 | 625        | 6486            | 3     | 1          | 1132.314  | 1132.037 | 991.108  | 1160.342         | 0.453                  |
| 30.A100 <sub>4</sub> | 11.938     | 12123 | 238        | 3562            | 1     | 0          | 1000.445  | 1000.445 | 865.918  | 1029.003         | 0.547                  |
| 30.A100 <sub>5</sub> | 6.110      | 11502 | 161        | 2477            | 1     | 0          | 1321.558  | 1321.558 | 1183.520 | 1343.434         | 0.265                  |
| 30.A100 <sub>6</sub> | 126.687    | 21898 | 869        | 10308           | 3     | 1          | 983.470   | 983.448  | 861.321  | 1012.679         | 0.906                  |
| 30.A100 <sub>7</sub> | 62.094     | 16170 | 1609       | 10726           | 25    | 6          | 1398.532  | 1397.295 | 1272.958 | 1427.232         | 0.281                  |
| 30.A100 <sub>8</sub> | 6.516      | 11909 | 186        | 2142            | 1     | 0          | 1310.284  | 1310.284 | 1174.020 | 1338.060         | 0.203                  |
| 30.A100 <sub>9</sub> | 7.875      | 10933 | 175        | 2839            | 1     | 0          | 1219.463  | 1219.463 | 1073.800 | 1248.626         | 0.328                  |

Table 8: Results of the benchmark configuration on  $A$ -instances with  $p = 15$  and  $\Delta = 500$ .

| Instance             | CPU (sec.) | Cols  | RMP solved | Col. gen. calls | Nodes | Tree depth | Best Int. | root LB  | GG value | $p$ -median opt. | $p$ -median CPU (sec.) |
|----------------------|------------|-------|------------|-----------------|-------|------------|-----------|----------|----------|------------------|------------------------|
| 20.A500 <sub>0</sub> | 1.125      | 4537  | 64         | 593             | 1     | 0          | 3263.108  | 3263.108 | 3211.780 | 3301.692         | 0.047                  |
| 20.A500 <sub>1</sub> | 0.610      | 3702  | 30         | 328             | 1     | 0          | 4087.651  | 4087.651 | 4027.649 | 4157.076         | 0.047                  |
| 20.A500 <sub>2</sub> | 1.079      | 4471  | 63         | 443             | 1     | 0          | 3756.168  | 3756.168 | 3679.625 | 3796.597         | 0.063                  |
| 20.A500 <sub>3</sub> | 1.391      | 5750  | 71         | 504             | 1     | 0          | 2660.881  | 2660.881 | 2586.428 | 2700.426         | 0.094                  |
| 20.A500 <sub>4</sub> | 0.812      | 4249  | 42         | 400             | 1     | 0          | 2831.135  | 2831.135 | 2757.893 | 2883.193         | 0.078                  |
| 20.A500 <sub>5</sub> | 0.406      | 3314  | 25         | 275             | 1     | 0          | 3135.443  | 3135.443 | 3074.316 | 3197.673         | 0.047                  |
| 20.A500 <sub>6</sub> | 0.375      | 3248  | 24         | 307             | 1     | 0          | 3530.330  | 3530.330 | 3451.406 | 3577.870         | 0.047                  |
| 20.A500 <sub>7</sub> | 2.032      | 5858  | 93         | 652             | 1     | 0          | 3031.764  | 3031.764 | 2965.779 | 3072.982         | 0.078                  |
| 20.A500 <sub>8</sub> | 0.407      | 3488  | 39         | 299             | 1     | 0          | 3417.586  | 3417.586 | 3337.080 | 3467.150         | 0.047                  |
| 20.A500 <sub>9</sub> | 0.922      | 4717  | 36         | 361             | 1     | 0          | 3641.247  | 3641.247 | 3588.201 | 3712.105         | 0.078                  |
| 25.A500 <sub>0</sub> | 13.000     | 12466 | 115        | 2161            | 1     | 0          | 4006.766  | 4006.766 | 3906.522 | 4072.446         | 0.250                  |
| 25.A500 <sub>1</sub> | 8.860      | 9393  | 220        | 1797            | 7     | 2          | 5266.982  | 5266.762 | 5193.226 | 5334.584         | 0.172                  |
| 25.A500 <sub>2</sub> | 0.922      | 5408  | 40         | 483             | 1     | 0          | 4088.946  | 4088.946 | 4017.501 | 4130.573         | 0.078                  |
| 25.A500 <sub>3</sub> | 3.437      | 10647 | 76         | 719             | 1     | 0          | 5186.294  | 5186.294 | 5130.970 | 5259.608         | 0.156                  |
| 25.A500 <sub>4</sub> | 2.094      | 8290  | 72         | 656             | 1     | 0          | 4040.912  | 4040.912 | 3964.050 | 4096.792         | 0.125                  |
| 25.A500 <sub>5</sub> | 4.203      | 12465 | 79         | 839             | 1     | 0          | 4030.906  | 4030.906 | 3964.712 | 4083.066         | 0.172                  |
| 25.A500 <sub>6</sub> | 2.672      | 9048  | 62         | 722             | 1     | 0          | 4746.136  | 4746.136 | 4661.071 | 4831.464         | 0.188                  |
| 25.A500 <sub>7</sub> | 3.328      | 11683 | 55         | 812             | 1     | 0          | 3879.252  | 3879.252 | 3797.845 | 3913.105         | 0.203                  |
| 25.A500 <sub>8</sub> | 5.406      | 9506  | 110        | 1331            | 1     | 0          | 4761.528  | 4761.528 | 4661.332 | 4839.657         | 0.297                  |
| 25.A500 <sub>9</sub> | 15.297     | 8923  | 314        | 3162            | 9     | 4          | 6103.305  | 6102.592 | 6005.576 | 6170.648         | 0.157                  |
| 30.A500 <sub>0</sub> | 10.078     | 16754 | 113        | 1585            | 1     | 0          | 6133.404  | 6133.404 | 6024.263 | 6189.377         | 0.312                  |
| 30.A500 <sub>1</sub> | 3.375      | 11258 | 60         | 870             | 1     | 0          | 8000.788  | 8000.788 | 7896.254 | 8090.658         | 0.219                  |
| 30.A500 <sub>2</sub> | 2.859      | 8400  | 65         | 1153            | 1     | 0          | 5603.431  | 5603.431 | 5515.665 | 5692.387         | 0.156                  |
| 30.A500 <sub>3</sub> | 5.828      | 13047 | 119        | 1251            | 1     | 0          | 6263.390  | 6263.390 | 6154.585 | 6338.480         | 0.250                  |
| 30.A500 <sub>4</sub> | 16.625     | 17015 | 216        | 2149            | 1     | 0          | 5426.545  | 5426.545 | 5318.490 | 5519.621         | 0.375                  |
| 30.A500 <sub>5</sub> | 4.125      | 10710 | 80         | 1143            | 1     | 0          | 5871.283  | 5871.283 | 5758.910 | 5952.179         | 0.250                  |
| 30.A500 <sub>6</sub> | 6.016      | 11255 | 95         | 1493            | 1     | 0          | 6041.001  | 6041.001 | 5943.459 | 6126.398         | 0.282                  |
| 30.A500 <sub>7</sub> | 6.047      | 12025 | 112        | 1356            | 1     | 0          | 6024.311  | 6024.311 | 5919.468 | 6092.800         | 0.344                  |
| 30.A500 <sub>8</sub> | 40.265     | 15708 | 768        | 6181            | 23    | 7          | 6333.130  | 6332.471 | 6235.540 | 6391.051         | 0.391                  |
| 30.A500 <sub>9</sub> | 4.468      | 12583 | 74         | 1103            | 1     | 0          | 3591.532  | 3591.532 | 3507.390 | 3648.311         | 0.218                  |

Table 9: Results of the benchmark configuration on  $A$ -instances with  $p = 10$  and  $\Delta = 500$ .

| Instance             | CPU (sec.) | Cols  | RMP solved | Col. gen. calls | Nodes | Tree depth | Best Int. | root LB  | GG value | $p$ -median opt. | $p$ -median CPU (sec.) |
|----------------------|------------|-------|------------|-----------------|-------|------------|-----------|----------|----------|------------------|------------------------|
| 20.A500 <sub>0</sub> | 4.406      | 5058  | 219        | 1533            | 5     | 2          | 3275.919  | 3275.832 | 3219.976 | 3309.022         | 0.062                  |
| 20.A500 <sub>1</sub> | 1.547      | 4034  | 78         | 829             | 1     | 0          | 4111.939  | 4111.939 | 4040.124 | 4175.510         | 0.063                  |
| 20.A500 <sub>2</sub> | 2.094      | 4664  | 107        | 929             | 1     | 0          | 3788.861  | 3788.861 | 3696.349 | 3824.218         | 0.078                  |
| 20.A500 <sub>3</sub> | 2.454      | 6012  | 107        | 845             | 1     | 0          | 2677.293  | 2677.293 | 2596.472 | 2720.807         | 0.157                  |
| 20.A500 <sub>4</sub> | 1.640      | 4547  | 69         | 876             | 1     | 0          | 2847.225  | 2847.225 | 2772.202 | 2901.989         | 0.062                  |
| 20.A500 <sub>5</sub> | 2.375      | 3845  | 175        | 1421            | 5     | 2          | 3151.647  | 3151.285 | 3084.061 | 3213.166         | 0.063                  |
| 20.A500 <sub>6</sub> | 0.750      | 3469  | 46         | 611             | 1     | 0          | 3553.832  | 3553.832 | 3469.588 | 3598.039         | 0.063                  |
| 20.A500 <sub>7</sub> | 3.734      | 6240  | 138        | 1185            | 1     | 0          | 3048.733  | 3048.733 | 2979.329 | 3094.968         | 0.110                  |
| 20.A500 <sub>8</sub> | 0.735      | 3643  | 59         | 581             | 1     | 0          | 3428.446  | 3428.446 | 3342.609 | 3470.358         | 0.047                  |
| 20.A500 <sub>9</sub> | 2.281      | 5096  | 122        | 786             | 1     | 0          | 3669.244  | 3669.244 | 3603.779 | 3734.049         | 0.093                  |
| 25.A500 <sub>0</sub> | 84.000     | 16449 | 1096       | 8556            | 13    | 5          | 4045.568  | 4044.272 | 3934.433 | 4116.692         | 0.516                  |
| 25.A500 <sub>1</sub> | 11.407     | 10071 | 228        | 2810            | 3     | 1          | 5294.620  | 5294.554 | 5213.281 | 5364.840         | 0.203                  |
| 25.A500 <sub>2</sub> | 1.907      | 5733  | 79         | 809             | 1     | 0          | 4104.878  | 4104.878 | 4026.658 | 4151.981         | 0.141                  |
| 25.A500 <sub>3</sub> | 9.609      | 11514 | 223        | 1821            | 1     | 0          | 5219.005  | 5219.005 | 5152.695 | 5296.802         | 0.329                  |
| 25.A500 <sub>4</sub> | 4.110      | 8729  | 108        | 1260            | 1     | 0          | 4070.739  | 4070.739 | 3982.308 | 4124.420         | 0.156                  |
| 25.A500 <sub>5</sub> | 12.344     | 13176 | 253        | 2410            | 1     | 0          | 4063.074  | 4063.074 | 3991.593 | 4117.883         | 0.344                  |
| 25.A500 <sub>6</sub> | 5.079      | 9480  | 107        | 1254            | 1     | 0          | 4786.928  | 4786.928 | 4698.439 | 4878.007         | 0.203                  |
| 25.A500 <sub>7</sub> | 7.313      | 12264 | 136        | 1573            | 1     | 0          | 3908.181  | 3908.181 | 3822.675 | 3945.768         | 0.391                  |
| 25.A500 <sub>8</sub> | 21.375     | 10751 | 200        | 2956            | 1     | 0          | 4806.744  | 4806.744 | 4693.040 | 4880.946         | 0.219                  |
| 25.A500 <sub>9</sub> | 21.266     | 9769  | 415        | 3959            | 7     | 2          | 6151.023  | 6150.443 | 6046.671 | 6215.024         | 0.171                  |
| 30.A500 <sub>0</sub> | 18.265     | 17685 | 145        | 2666            | 1     | 0          | 6191.655  | 6191.655 | 6072.594 | 6249.923         | 0.796                  |
| 30.A500 <sub>1</sub> | 8.016      | 12011 | 155        | 2038            | 1     | 0          | 8076.900  | 8076.900 | 7971.574 | 8163.416         | 0.282                  |
| 30.A500 <sub>2</sub> | 4.032      | 8821  | 91         | 1500            | 1     | 0          | 5642.909  | 5642.909 | 5548.471 | 5741.144         | 0.203                  |
| 30.A500 <sub>3</sub> | 206.500    | 21439 | 2968       | 21011           | 49    | 10         | 6324.135  | 6321.764 | 6201.017 | 6394.265         | 0.375                  |
| 30.A500 <sub>4</sub> | 49.234     | 19145 | 279        | 4982            | 1     | 0          | 5467.803  | 5467.803 | 5353.818 | 5559.708         | 0.375                  |
| 30.A500 <sub>5</sub> | 9.454      | 11422 | 139        | 2223            | 1     | 0          | 5923.802  | 5923.802 | 5804.416 | 6007.934         | 0.281                  |
| 30.A500 <sub>6</sub> | 11.844     | 11987 | 159        | 2294            | 1     | 0          | 6107.116  | 6107.116 | 5999.833 | 6187.919         | 0.282                  |
| 30.A500 <sub>7</sub> | 7.297      | 12436 | 115        | 1570            | 1     | 0          | 6074.246  | 6074.246 | 5974.785 | 6146.011         | 0.313                  |
| 30.A500 <sub>8</sub> | 9.938      | 14548 | 133        | 1959            | 1     | 0          | 6376.886  | 6376.886 | 6275.732 | 6439.377         | 0.375                  |
| 30.A500 <sub>9</sub> | 24.656     | 13695 | 415        | 2872            | 3     | 1          | 3616.687  | 3616.634 | 3527.081 | 3677.246         | 0.234                  |

Table 10: Results of the benchmark configuration on  $A$ -instances with  $p = 5$  and  $\Delta = 500$ .

| Instance             | CPU (sec.) | Cols  | RMP solved | Col. gen. calls | Nodes | Tree depth | Best Int. | root LB  | GG value | $p$ -median opt. | $p$ -median CPU (sec.) |
|----------------------|------------|-------|------------|-----------------|-------|------------|-----------|----------|----------|------------------|------------------------|
| 20.A500 <sub>0</sub> | 11.281     | 6276  | 334        | 2862            | 3     | 1          | 3336.866  | 3336.838 | 3266.415 | 3368.034         | 0.109                  |
| 20.A500 <sub>1</sub> | 8.406      | 5241  | 191        | 2309            | 1     | 0          | 4190.971  | 4190.971 | 4103.290 | 4251.480         | 0.094                  |
| 20.A500 <sub>2</sub> | 16.656     | 6429  | 442        | 3176            | 3     | 1          | 3864.517  | 3863.904 | 3768.885 | 3901.349         | 0.125                  |
| 20.A500 <sub>3</sub> | 21.781     | 8625  | 443        | 4477            | 3     | 1          | 2731.320  | 2730.672 | 2638.156 | 2779.085         | 0.125                  |
| 20.A500 <sub>4</sub> | 11.797     | 6457  | 176        | 2971            | 1     | 0          | 2922.880  | 2922.880 | 2827.059 | 2972.510         | 0.093                  |
| 20.A500 <sub>5</sub> | 3.891      | 4548  | 129        | 1949            | 1     | 0          | 3231.672  | 3231.672 | 3138.133 | 3294.912         | 0.078                  |
| 20.A500 <sub>6</sub> | 1.610      | 3981  | 78         | 1158            | 1     | 0          | 3630.408  | 3630.408 | 3544.593 | 3679.819         | 0.063                  |
| 20.A500 <sub>7</sub> | 7.187      | 7134  | 217        | 1981            | 1     | 0          | 3108.995  | 3108.995 | 3036.280 | 3167.008         | 0.125                  |
| 20.A500 <sub>8</sub> | 1.015      | 3852  | 82         | 691             | 1     | 0          | 3499.478  | 3499.478 | 3409.283 | 3524.699         | 0.063                  |
| 20.A500 <sub>9</sub> | 7.484      | 6382  | 241        | 2283            | 1     | 0          | 3762.206  | 3762.206 | 3679.071 | 3821.381         | 0.125                  |
| 25.A500 <sub>1</sub> | 12.094     | 10994 | 207        | 2909            | 1     | 0          | 5389.726  | 5389.726 | 5289.437 | 5450.474         | 0.235                  |
| 25.A500 <sub>2</sub> | 4.359      | 6362  | 203        | 1707            | 1     | 0          | 4164.845  | 4164.845 | 4078.276 | 4214.858         | 0.141                  |
| 25.A500 <sub>3</sub> | 132.532    | 18535 | 1289       | 11540           | 9     | 4          | 5355.085  | 5352.946 | 5259.727 | 5418.740         | 0.437                  |
| 25.A500 <sub>4</sub> | 326.469    | 20111 | 1976       | 21268           | 33    | 14         | 4177.920  | 4172.802 | 4069.522 | 4230.620         | 0.312                  |
| 25.A500 <sub>6</sub> | 36.360     | 12746 | 334        | 5279            | 1     | 0          | 4911.794  | 4911.794 | 4792.144 | 5014.993         | 0.719                  |
| 25.A500 <sub>7</sub> | 18.031     | 14060 | 227        | 3511            | 1     | 0          | 4005.809  | 4005.809 | 3902.033 | 4049.538         | 0.547                  |
| 25.A500 <sub>8</sub> | 33.719     | 12391 | 293        | 4685            | 1     | 0          | 4919.340  | 4919.340 | 4796.037 | 5000.955         | 0.328                  |
| 25.A500 <sub>9</sub> | 64.204     | 11537 | 280        | 5373            | 1     | 0          | 6301.938  | 6301.938 | 6163.959 | 6349.600         | 0.281                  |
| 30.A500 <sub>1</sub> | 27.281     | 14474 | 419        | 4859            | 1     | 0          | 8293.942  | 8293.942 | 8189.434 | 8370.675         | 0.563                  |
| 30.A500 <sub>2</sub> | 30.063     | 11482 | 501        | 6621            | 3     | 1          | 5807.038  | 5805.812 | 5681.175 | 5889.638         | 0.296                  |
| 30.A500 <sub>5</sub> | 39.610     | 13545 | 285        | 4854            | 1     | 0          | 6067.706  | 6067.706 | 5927.143 | 6159.149         | 0.437                  |
| 30.A500 <sub>9</sub> | 36.625     | 16207 | 376        | 5263            | 1     | 0          | 3705.621  | 3705.621 | 3603.251 | 3778.538         | 0.422                  |

Table 11: Results of the benchmark configuration on  $A$ -instances with  $p = 15$  and  $\Delta = 1000$ .

| Instance              | CPU (sec.) | Cols  | RMP solved | Col. gen. calls | Nodes | Tree depth | Best Int. | root LB   | GG value  | $p$ -median opt. | $p$ -median CPU (sec.) |
|-----------------------|------------|-------|------------|-----------------|-------|------------|-----------|-----------|-----------|------------------|------------------------|
| 20.A1000 <sub>0</sub> | 3.234      | 6961  | 65         | 635             | 1     | 0          | 6883.022  | 6883.022  | 6820.671  | 6942.726         | 0.109                  |
| 20.A1000 <sub>1</sub> | 2.750      | 5769  | 48         | 675             | 1     | 0          | 8918.100  | 8918.100  | 8844.451  | 8979.760         | 0.094                  |
| 20.A1000 <sub>2</sub> | 2.594      | 5429  | 73         | 707             | 1     | 0          | 5951.605  | 5951.605  | 5891.000  | 6009.190         | 0.094                  |
| 20.A1000 <sub>3</sub> | 1.453      | 4271  | 50         | 417             | 1     | 0          | 9188.685  | 9188.685  | 9127.055  | 9246.680         | 0.063                  |
| 20.A1000 <sub>4</sub> | 2.516      | 5396  | 77         | 573             | 1     | 0          | 7683.044  | 7683.044  | 7619.430  | 7771.124         | 0.094                  |
| 20.A1000 <sub>5</sub> | 1.406      | 4447  | 52         | 482             | 1     | 0          | 6119.637  | 6119.637  | 6044.068  | 6170.552         | 0.062                  |
| 20.A1000 <sub>6</sub> | 2.359      | 5194  | 118        | 611             | 1     | 0          | 6954.153  | 6954.153  | 6882.621  | 7003.431         | 0.078                  |
| 20.A1000 <sub>7</sub> | 0.750      | 4486  | 26         | 336             | 1     | 0          | 5925.984  | 5925.984  | 5867.481  | 5986.433         | 0.078                  |
| 20.A1000 <sub>8</sub> | 5.719      | 7976  | 118        | 1080            | 1     | 0          | 4598.323  | 4598.323  | 4536.734  | 4671.843         | 0.140                  |
| 20.A1000 <sub>9</sub> | 1.407      | 3806  | 44         | 510             | 1     | 0          | 6989.577  | 6989.577  | 6923.939  | 7032.769         | 0.063                  |
| 25.A1000 <sub>0</sub> | 5.391      | 8438  | 67         | 1186            | 1     | 0          | 8332.951  | 8332.951  | 8244.605  | 8401.429         | 0.156                  |
| 25.A1000 <sub>1</sub> | 3.078      | 6146  | 51         | 846             | 1     | 0          | 9643.857  | 9643.857  | 9562.220  | 9710.740         | 0.093                  |
| 25.A1000 <sub>2</sub> | 2.453      | 6161  | 74         | 654             | 1     | 0          | 9543.894  | 9543.894  | 9473.048  | 9598.301         | 0.110                  |
| 25.A1000 <sub>3</sub> | 6.188      | 9858  | 110        | 1138            | 1     | 0          | 9101.981  | 9101.981  | 9015.463  | 9177.337         | 0.219                  |
| 25.A1000 <sub>4</sub> | 5.485      | 9963  | 107        | 907             | 1     | 0          | 7816.358  | 7816.358  | 7721.121  | 7879.562         | 0.172                  |
| 25.A1000 <sub>5</sub> | 4.532      | 7719  | 123        | 1262            | 3     | 1          | 8385.696  | 8385.673  | 8284.168  | 8473.923         | 0.140                  |
| 25.A1000 <sub>6</sub> | 2.094      | 6741  | 61         | 592             | 1     | 0          | 9552.449  | 9552.449  | 9469.900  | 9640.136         | 0.125                  |
| 25.A1000 <sub>7</sub> | 8.266      | 10910 | 88         | 1352            | 1     | 0          | 7724.630  | 7724.630  | 7651.881  | 7806.386         | 0.157                  |
| 25.A1000 <sub>8</sub> | 5.782      | 8496  | 110        | 1139            | 1     | 0          | 9143.829  | 9143.829  | 9070.315  | 9216.792         | 0.125                  |
| 25.A1000 <sub>9</sub> | 7.688      | 9224  | 114        | 1333            | 1     | 0          | 8190.873  | 8190.873  | 8108.173  | 8262.778         | 0.172                  |
| 30.A1000 <sub>0</sub> | 6.563      | 11576 | 91         | 1062            | 1     | 0          | 11738.716 | 11738.716 | 11637.305 | 11832.216        | 0.282                  |
| 30.A1000 <sub>1</sub> | 7.422      | 10841 | 226        | 1317            | 3     | 1          | 14149.879 | 14149.626 | 14076.960 | 14219.668        | 0.234                  |
| 30.A1000 <sub>2</sub> | 41.281     | 14750 | 340        | 3882            | 3     | 1          | 9086.772  | 9086.470  | 8995.326  | 9181.104         | 0.265                  |
| 30.A1000 <sub>3</sub> | 13.734     | 12504 | 173        | 2046            | 1     | 0          | 10984.299 | 10984.299 | 10902.900 | 11055.858        | 0.250                  |
| 30.A1000 <sub>4</sub> | 4.610      | 8823  | 125        | 1083            | 1     | 0          | 11654.641 | 11654.641 | 11550.883 | 11718.606        | 0.156                  |
| 30.A1000 <sub>5</sub> | 23.141     | 13613 | 221        | 3436            | 3     | 1          | 8222.090  | 8221.929  | 8143.708  | 8285.047         | 0.281                  |
| 30.A1000 <sub>6</sub> | 11.156     | 13890 | 87         | 1604            | 1     | 0          | 10010.111 | 10010.111 | 9913.486  | 10088.774        | 0.312                  |
| 30.A1000 <sub>7</sub> | 10.079     | 11577 | 212        | 1950            | 3     | 1          | 10684.085 | 10683.930 | 10577.247 | 10799.758        | 0.235                  |
| 30.A1000 <sub>8</sub> | 5.907      | 10801 | 88         | 1208            | 1     | 0          | 9140.488  | 9140.488  | 9064.157  | 9212.894         | 0.204                  |
| 30.A1000 <sub>9</sub> | 4.672      | 9850  | 118        | 1027            | 1     | 0          | 9699.154  | 9699.154  | 9607.361  | 9767.276         | 0.219                  |

Table 12: Results of the benchmark configuration on  $A$ -instances with  $p = 10$  and  $\Delta = 1000$ .

| Instance              | CPU (sec.) | Cols  | RMP solved | Col. gen. calls | Nodes | Tree depth | Best Int. | root LB   | GG value  | $p$ -median opt. | $p$ -median CPU (sec.) |
|-----------------------|------------|-------|------------|-----------------|-------|------------|-----------|-----------|-----------|------------------|------------------------|
| 20.A1000 <sub>0</sub> | 35.265     | 10049 | 1006       | 5062            | 9     | 4          | 6923.620  | 6922.762  | 6852.816  | 6981.601         | 0.156                  |
| 20.A1000 <sub>1</sub> | 6.500      | 6343  | 146        | 1483            | 1     | 0          | 8979.326  | 8979.326  | 8898.752  | 9045.883         | 0.110                  |
| 20.A1000 <sub>2</sub> | 3.875      | 5841  | 96         | 1079            | 1     | 0          | 5977.979  | 5977.979  | 5908.167  | 6040.466         | 0.094                  |
| 20.A1000 <sub>3</sub> | 2.953      | 4557  | 81         | 835             | 1     | 0          | 9237.007  | 9237.007  | 9170.108  | 9292.190         | 0.062                  |
| 20.A1000 <sub>4</sub> | 4.078      | 5713  | 90         | 1007            | 1     | 0          | 7725.328  | 7725.328  | 7657.197  | 7818.493         | 0.078                  |
| 20.A1000 <sub>5</sub> | 2.531      | 4676  | 91         | 812             | 1     | 0          | 6155.793  | 6155.793  | 6075.209  | 6210.230         | 0.062                  |
| 20.A1000 <sub>6</sub> | 4.297      | 5588  | 155        | 1117            | 1     | 0          | 7007.637  | 7007.637  | 6912.466  | 7054.010         | 0.093                  |
| 20.A1000 <sub>7</sub> | 1.828      | 4848  | 71         | 732             | 1     | 0          | 5952.942  | 5952.942  | 5885.432  | 6012.635         | 0.078                  |
| 20.A1000 <sub>8</sub> | 12.891     | 8903  | 172        | 2102            | 1     | 0          | 4624.732  | 4624.732  | 4556.020  | 4701.433         | 0.203                  |
| 20.A1000 <sub>9</sub> | 3.688      | 4299  | 159        | 1181            | 3     | 1          | 7042.994  | 7042.814  | 6967.937  | 7091.395         | 0.063                  |
| 25.A1000 <sub>0</sub> | 8.454      | 8995  | 121        | 1743            | 1     | 0          | 8380.401  | 8380.401  | 8290.699  | 8465.762         | 0.187                  |
| 25.A1000 <sub>1</sub> | 3.907      | 6447  | 65         | 996             | 1     | 0          | 9719.174  | 9719.174  | 9621.983  | 9791.803         | 0.141                  |
| 25.A1000 <sub>2</sub> | 4.860      | 6654  | 91         | 1239            | 1     | 0          | 9627.939  | 9627.939  | 9547.563  | 9672.490         | 0.125                  |
| 25.A1000 <sub>3</sub> | 9.141      | 10383 | 120        | 1733            | 1     | 0          | 9158.944  | 9158.944  | 9061.382  | 9250.694         | 0.375                  |
| 25.A1000 <sub>4</sub> | 13.079     | 10709 | 191        | 2294            | 1     | 0          | 7859.196  | 7859.196  | 7752.936  | 7926.309         | 0.234                  |
| 25.A1000 <sub>5</sub> | 6.094      | 8230  | 125        | 1637            | 1     | 0          | 8441.475  | 8441.475  | 8337.456  | 8534.179         | 0.250                  |
| 25.A1000 <sub>6</sub> | 4.735      | 7219  | 114        | 1346            | 1     | 0          | 9618.026  | 9618.026  | 9534.521  | 9722.141         | 0.172                  |
| 25.A1000 <sub>7</sub> | 14.891     | 11614 | 184        | 2216            | 1     | 0          | 7764.793  | 7764.793  | 7690.104  | 7843.998         | 0.187                  |
| 25.A1000 <sub>8</sub> | 27.672     | 10656 | 512        | 4238            | 3     | 1          | 9219.512  | 9219.504  | 9128.311  | 9295.407         | 0.218                  |
| 25.A1000 <sub>9</sub> | 10.625     | 9695  | 146        | 1773            | 1     | 0          | 8240.374  | 8240.374  | 8155.015  | 8318.602         | 0.188                  |
| 30.A1000 <sub>0</sub> | 16.141     | 12830 | 131        | 2518            | 1     | 0          | 11850.143 | 11850.143 | 11733.092 | 11943.516        | 0.516                  |
| 30.A1000 <sub>1</sub> | 5.078      | 10902 | 89         | 1011            | 1     | 0          | 14209.772 | 14209.772 | 14135.937 | 14288.884        | 0.219                  |
| 30.A1000 <sub>2</sub> | 103.531    | 17706 | 715        | 7897            | 5     | 2          | 9140.372  | 9140.270  | 9039.931  | 9241.146         | 0.343                  |
| 30.A1000 <sub>3</sub> | 17.313     | 13181 | 235        | 2441            | 1     | 0          | 11068.963 | 11068.963 | 10988.534 | 11143.241        | 0.328                  |
| 30.A1000 <sub>4</sub> | 8.563      | 9316  | 211        | 2081            | 1     | 0          | 11750.760 | 11750.760 | 11642.507 | 11821.271        | 0.234                  |
| 30.A1000 <sub>5</sub> | 146.500    | 19725 | 1821       | 14414           | 15    | 4          | 8283.818  | 8283.029  | 8199.695  | 8348.349         | 0.375                  |
| 30.A1000 <sub>7</sub> | 14.234     | 12323 | 159        | 2891            | 1     | 0          | 10765.149 | 10765.149 | 10654.659 | 10886.022        | 0.281                  |
| 30.A1000 <sub>8</sub> | 9.016      | 11154 | 157        | 1804            | 1     | 0          | 9190.626  | 9190.626  | 9109.721  | 9259.443         | 0.204                  |
| 30.A1000 <sub>9</sub> | 26.438     | 11953 | 305        | 4440            | 7     | 2          | 9770.427  | 9769.890  | 9659.041  | 9835.069         | 0.250                  |

Table 13: Results of the benchmark configuration on  $A$ -instances with  $p = 5$  and  $\Delta = 1000$ .

| Instance              | CPU (sec.) | Cols  | RMP solved | Col. gen. calls | Nodes | Tree depth | Best Int. | root LB   | GG value  | $p$ -median opt. | $p$ -median CPU (sec.) |
|-----------------------|------------|-------|------------|-----------------|-------|------------|-----------|-----------|-----------|------------------|------------------------|
| 20.A1000 <sub>0</sub> | 24.782     | 9643  | 297        | 3674            | 1     | 0          | 7089.932  | 7089.932  | 6987.903  | 7149.297         | 0.234                  |
| 20.A1000 <sub>1</sub> | 17.297     | 8124  | 306        | 3349            | 1     | 0          | 9144.752  | 9144.752  | 9051.589  | 9206.117         | 0.141                  |
| 20.A1000 <sub>2</sub> | 28.953     | 8931  | 482        | 5024            | 5     | 1          | 6085.316  | 6084.756  | 5999.367  | 6144.121         | 0.157                  |
| 20.A1000 <sub>3</sub> | 52.906     | 8460  | 1002       | 7533            | 15    | 7          | 9460.151  | 9456.591  | 9365.449  | 9509.541         | 0.125                  |
| 20.A1000 <sub>4</sub> | 8.969      | 6586  | 173        | 1976            | 1     | 0          | 7898.616  | 7898.616  | 7813.205  | 8015.628         | 0.141                  |
| 20.A1000 <sub>5</sub> | 8.047      | 5744  | 167        | 2224            | 1     | 0          | 6310.995  | 6310.995  | 6206.982  | 6352.936         | 0.093                  |
| 20.A1000 <sub>6</sub> | 8.625      | 6353  | 224        | 2222            | 1     | 0          | 7145.485  | 7145.485  | 7037.357  | 7202.502         | 0.125                  |
| 20.A1000 <sub>7</sub> | 4.703      | 5641  | 150        | 1812            | 1     | 0          | 6045.702  | 6045.702  | 5953.372  | 6095.143         | 0.093                  |
| 20.A1000 <sub>8</sub> | 337.719    | 20219 | 1430       | 16280           | 17    | 5          | 4742.934  | 4739.262  | 4638.058  | 4805.192         | 0.531                  |
| 20.A1000 <sub>9</sub> | 5.063      | 4686  | 206        | 1491            | 1     | 0          | 7179.718  | 7179.718  | 7106.084  | 7226.424         | 0.078                  |
| 25.A1000 <sub>0</sub> | 138.485    | 17795 | 1395       | 14722           | 9     | 3          | 8618.191  | 8613.077  | 8507.139  | 8690.026         | 0.843                  |
| 25.A1000 <sub>1</sub> | 103.422    | 13123 | 1121       | 13262           | 9     | 4          | 9957.178  | 9954.933  | 9843.829  | 10042.412        | 0.391                  |
| 25.A1000 <sub>2</sub> | 48.515     | 10637 | 806        | 7981            | 9     | 3          | 9845.379  | 9843.185  | 9755.715  | 9889.995         | 0.203                  |
| 25.A1000 <sub>3</sub> | 24.032     | 12030 | 406        | 3592            | 1     | 0          | 9347.777  | 9347.777  | 9234.890  | 9419.453         | 0.281                  |
| 25.A1000 <sub>4</sub> | 20.391     | 11895 | 281        | 3101            | 1     | 0          | 8030.454  | 8030.454  | 7907.886  | 8087.831         | 0.328                  |
| 25.A1000 <sub>5</sub> | 92.844     | 14250 | 897        | 10360           | 9     | 4          | 8627.436  | 8626.678  | 8510.935  | 8707.711         | 0.265                  |
| 25.A1000 <sub>6</sub> | 18.969     | 9195  | 226        | 3831            | 1     | 0          | 9936.300  | 9936.300  | 9834.014  | 10026.957        | 0.203                  |
| 25.A1000 <sub>8</sub> | 53.125     | 12525 | 382        | 6426            | 1     | 0          | 9487.144  | 9487.144  | 9395.781  | 9575.925         | 0.687                  |
| 25.A1000 <sub>9</sub> | 68.235     | 13939 | 476        | 6964            | 1     | 0          | 8471.278  | 8471.278  | 8367.187  | 8576.359         | 3.141                  |
| 30.A1000 <sub>1</sub> | 27.234     | 13296 | 300        | 4397            | 1     | 0          | 14546.394 | 14546.394 | 14462.885 | 14643.456        | 0.532                  |
| 30.A1000 <sub>4</sub> | 16.000     | 10455 | 206        | 3507            | 1     | 0          | 12050.527 | 12050.527 | 11930.244 | 12110.023        | 0.235                  |
| 30.A1000 <sub>8</sub> | 30.766     | 13598 | 383        | 4836            | 1     | 0          | 9387.358  | 9387.358  | 9270.422  | 9462.739         | 0.422                  |
| 30.A1000 <sub>9</sub> | 121.125    | 16776 | 698        | 10828           | 5     | 1          | 9983.462  | 9983.349  | 9856.128  | 10045.482        | 0.797                  |
